# Supplementary material
Source: PubMed Central journal article supplement (PMC7897801)
Supplement: mmc1.pdf [file mmc1.pdf]

**Cell Reports Medicine, Volume 2**

**Supplemental Information**

**Comprehensive analysis of T cell  
immunodominance and immunoprevalence  
of SARS-CoV-2 epitopes in COVID-19 cases**

**Alison Tarke, John Sidney, Conner K. Kidd, Jennifer M. Dan, Sydney I. Ramirez, Esther Dawen Yu, Jose Mateus, Ricardo da Silva Antunes, Erin Moore, Paul Rubiro, Nils Methot, Elizabeth Phillips, Simon Mallal, April Frazier, Stephen A. Rawlings, Jason A. Greenbaum, Bjoern Peters, Davey M. Smith, Shane Crotty, Daniela Weiskopf, Alba Grifoni, and Alessandro Sette**

**Table S1.** Characteristics of donor cohorts utilized in the protein screen and utilized to validate megapools. Related to Fig. 1 and Fig. 5-7.

|                                                          | Protein Screen Cohort                              | Megapool Validation Cohorts   |                                                  |
|----------------------------------------------------------|----------------------------------------------------|-------------------------------|--------------------------------------------------|
|                                                          | COVID-19 (n = 99)                                  | Unexposed (n = 25)            | COVID-19 (n = 31)                                |
| <b>Age (years)</b>                                       | 19-91 [median = 41, IQR = 23]                      | 24-82 [Median = 36, IQR = 31] | 21-81 [Median = 38, IQR = 29]                    |
| <b>Gender</b>                                            |                                                    |                               |                                                  |
| <b>Male (%)</b>                                          | 41% (42/99)                                        | 52% (13/25)                   | 35% (11/31)                                      |
| <b>Female (%)</b>                                        | 59% (58/99)                                        | 48% (12/25)                   | 65% (20/31)                                      |
| <b>Sample Collection Date</b>                            | Mar-Sep 2020                                       | March - May 2020              | April - Sept 2020                                |
| <b>SARS-CoV-2 PCR</b>                                    | Positive = 100% (78/78)<br>Not tested= 21% (21/99) | N/A                           | Positive 100% (18/18)<br>Not tested= 42% (13/31) |
| <b>S RBD IgG</b>                                         | 98% (97/99)                                        | 0% (0/25)                     | 100% (31/31)                                     |
| <b>Peak disease Severity<sup>a</sup></b>                 |                                                    |                               |                                                  |
| <b>Mild</b>                                              | 91% (90/99)                                        | N/A                           | 58% (18/31)                                      |
| <b>Moderate</b>                                          | 2% (2/99)                                          | N/A                           | 36% (36/31)                                      |
| <b>Severe</b>                                            | 1% (1/99)                                          | N/A                           | 6% (2/31)                                        |
| <b>Critical</b>                                          | 6% (6/99)                                          | N/A                           | 0% (0/31)                                        |
| <b>Race-Ethnicity</b>                                    |                                                    |                               |                                                  |
| <b>White- not Hispanic or Latino</b>                     | 76% (76/99)                                        | 44% (11/25)                   | 81% (25/31)                                      |
| <b>Hispanic or Latino</b>                                | 12% (12/99)                                        | 8% (2/25)                     | 13% (4/31)                                       |
| <b>Asian</b>                                             | 5% (5/99)                                          | 12% (3/25)                    | 3% (1/31)                                        |
| <b>American Indian/Alaska Native</b>                     | 1% (1/99)                                          | 0% (0/25)                     | 0% (0/31)                                        |
| <b>Native Hawaiian or other Pacific Islander</b>         | 0% (0/99)                                          | 4% (1/25)                     | 0% (0/31)                                        |
| <b>Black or African American</b>                         | 2%(2/99)                                           | 0% (0/25)                     | 0% (0/31)                                        |
| <b>More than one race</b>                                | 3% (3/99)                                          | 0% (0/25)                     | 0% (0/31)                                        |
| <b>Not reported</b>                                      | 0% (0/99)                                          | 32% (8/25)                    | 3% (1/31)                                        |
| <b>Days Post Symptom Onset at Collection<sup>b</sup></b> | 3-184 (108/108)<br>[Median = 67, IQR = 48]         | N/A                           | 22-128 (31/31)<br>[Median = 69, IQR = 50]        |

<sup>a</sup>According to WHO criteria.

<sup>b</sup>Multiple visits for the same donor have been analyzed.

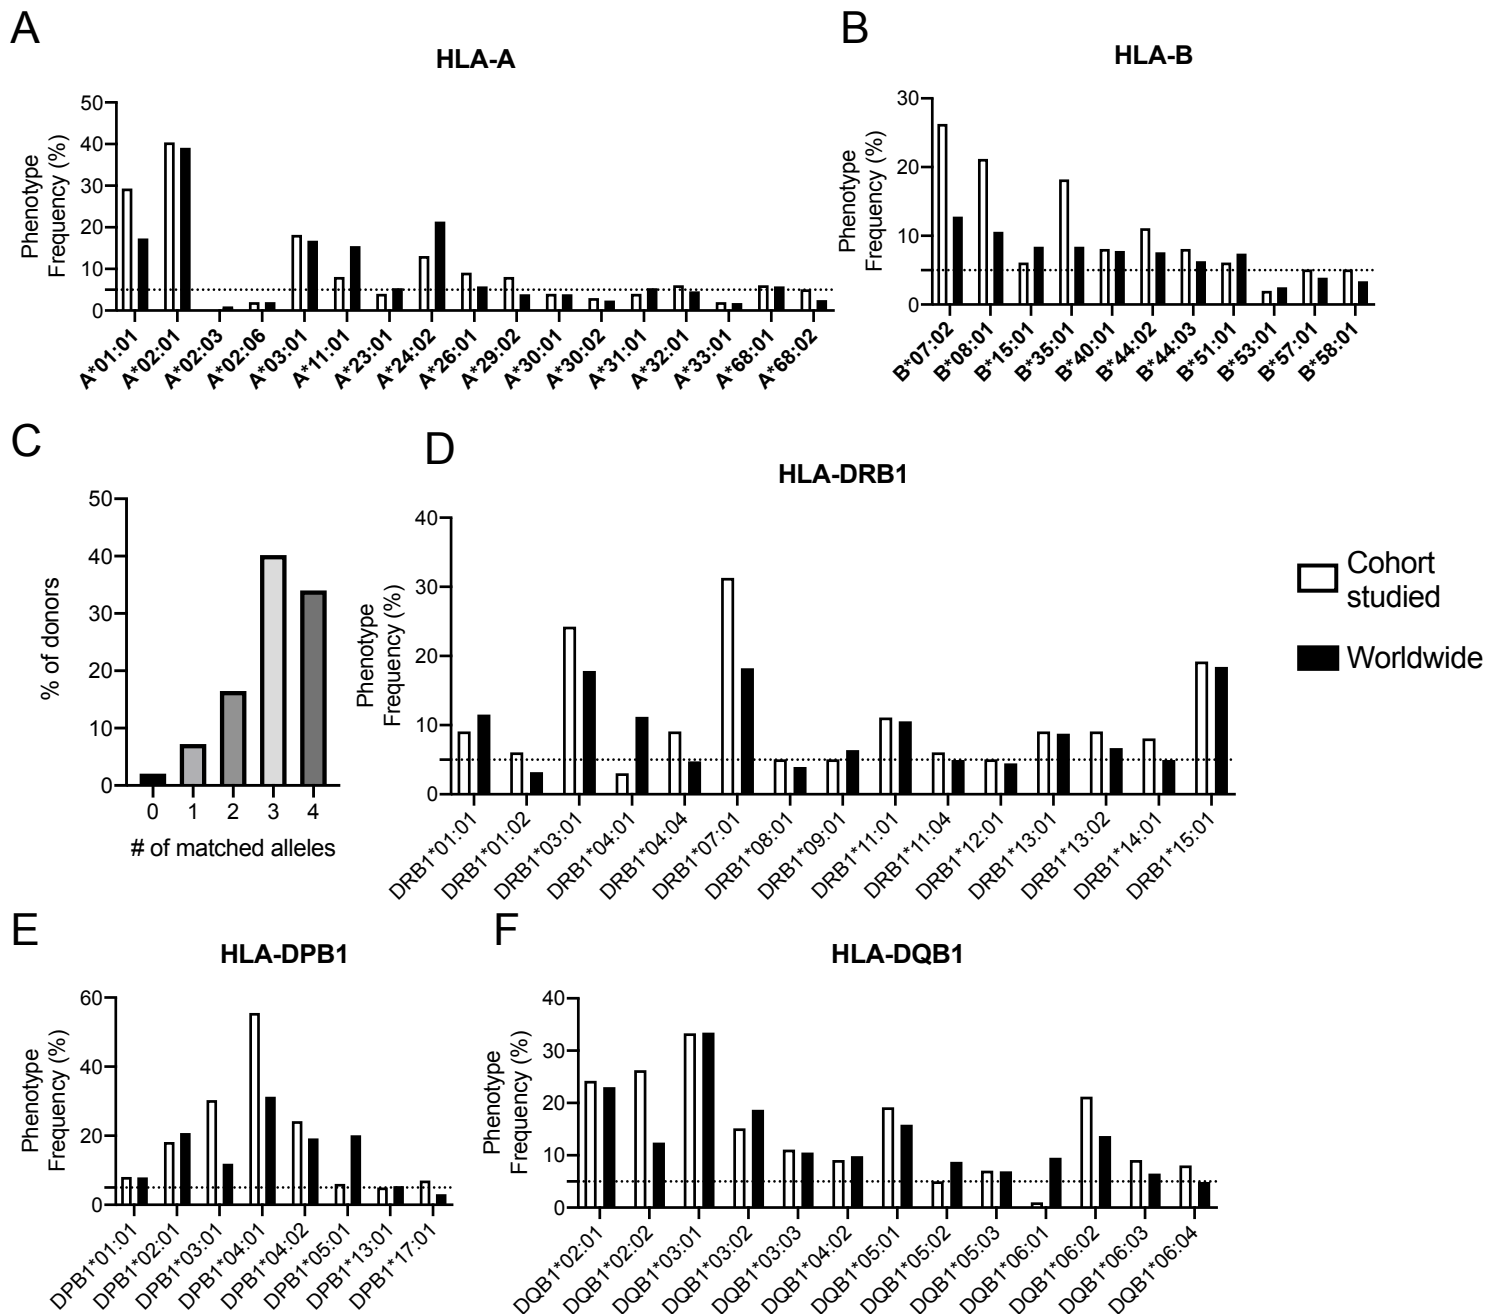

**Fig. S1. Analyses of HLA phenotype frequencies. Related to Fig. 4-5.**

HLA phenotype frequency in the COVID-19 cohort (n = 99) analyzed compared with the worldwide phenotype frequencies available in the IEDB-AR population coverage tool (Bui et al., 2006; Dhanda et al., 2019). HLA class I frequency for A and B loci for the top 28 HLA class I with frequency >5% in the worldwide population are shown in panels (A) and (B), respectively. Coverage of class I predicted peptides based on the HLA typing of the population (C). HLA class II frequency for DRB1, DP and DQ loci for the top HLA class II with frequency >5% in the worldwide population of the studied cohort are shown in panels (D), (E), and (F) respectively.

**Table S3.** Summary of SARS-CoV-2-specific T cell reactivity as a function of the most immunodominant proteins.<sup>a</sup> Related to Fig. 1.

| CD4 <sup>+</sup> T cells (n=99) |               |               |                |                            |                |                      |                | CD8 <sup>+</sup> T cells (n=99) |               |               |                |                            |                |                      |                |
|---------------------------------|---------------|---------------|----------------|----------------------------|----------------|----------------------|----------------|---------------------------------|---------------|---------------|----------------|----------------------------|----------------|----------------------|----------------|
| proteins                        | Frequency (%) | Total counts  | Average counts | % of responses per protein | Cumulative (%) | # of peptides tested | Cumulative (%) | proteins                        | Frequency (%) | Total counts  | Average counts | % of responses per protein | Cumulative (%) | # of peptides tested | Cumulative (%) |
| <b>S</b>                        | <b>95</b>     | <b>471873</b> | <b>4766</b>    | <b>26</b>                  | <b>25</b>      | <b>253</b>           | <b>13</b>      | <b>S</b>                        | <b>80</b>     | <b>440927</b> | <b>4454</b>    | <b>26</b>                  | <b>26</b>      | <b>253</b>           | <b>13</b>      |
| <b>M</b>                        | <b>96</b>     | <b>268883</b> | <b>2716</b>    | <b>17</b>                  | <b>43</b>      | <b>43</b>            | <b>15</b>      | <b>nsp3</b>                     | <b>49</b>     | <b>174104</b> | <b>1759</b>    | <b>17</b>                  | <b>43</b>      | <b>388</b>           | <b>33</b>      |
| <b>N</b>                        | <b>93</b>     | <b>220425</b> | <b>2227</b>    | <b>15</b>                  | <b>58</b>      | <b>82</b>            | <b>20</b>      | <b>N</b>                        | <b>75</b>     | <b>180191</b> | <b>1820</b>    | <b>15</b>                  | <b>58</b>      | <b>82</b>            | <b>38</b>      |
| <b>nsp3</b>                     | <b>70</b>     | <b>160567</b> | <b>1622</b>    | <b>8</b>                   | <b>66</b>      | <b>388</b>           | <b>40</b>      | <b>M</b>                        | <b>69</b>     | <b>149071</b> | <b>1506</b>    | <b>11</b>                  | <b>69</b>      | <b>43</b>            | <b>40</b>      |
| <b>ORF3a</b>                    | <b>76</b>     | <b>94025</b>  | <b>950</b>     | <b>5</b>                   | <b>70</b>      | <b>53</b>            | <b>43</b>      | <b>ORF3a</b>                    | <b>47</b>     | <b>58439</b>  | <b>590</b>     | <b>4</b>                   | <b>73</b>      | <b>53</b>            | <b>43</b>      |
| <b>nsp12</b>                    | <b>64</b>     | <b>75157</b>  | <b>759</b>     | <b>4</b>                   | <b>74</b>      | <b>186</b>           | <b>52</b>      | <b>nsp4</b>                     | <b>45</b>     | <b>39945</b>  | <b>403</b>     | <b>3</b>                   | <b>76</b>      | <b>100</b>           | <b>48</b>      |
| <b>nsp4</b>                     | <b>58</b>     | <b>68778</b>  | <b>695</b>     | <b>3</b>                   | <b>77</b>      | <b>100</b>           | <b>57</b>      | <b>nsp12</b>                    | <b>35</b>     | <b>26764</b>  | <b>270</b>     | <b>3</b>                   | <b>79</b>      | <b>186</b>           | <b>57</b>      |
| <b>nsp13</b>                    | <b>58</b>     | <b>51681</b>  | <b>522</b>     | <b>3</b>                   | <b>80</b>      | <b>120</b>           | <b>64</b>      | <b>nsp6</b>                     | <b>34</b>     | <b>26619</b>  | <b>269</b>     | <b>2</b>                   | <b>81</b>      | <b>58</b>            | <b>60</b>      |
| <b>ORF8</b>                     | <b>58</b>     | <b>50217</b>  | <b>507</b>     | <b>2</b>                   | <b>83</b>      | <b>23</b>            | <b>65</b>      | <b>nsp2</b>                     | <b>30</b>     | <b>22324</b>  | <b>225</b>     | <b>2</b>                   | <b>83</b>      | <b>127</b>           | <b>67</b>      |
| nsp16                           | 34            | 29175         | 295            | 2                          | 85             | 59                   | 68             | nsp1                            | 24            | 18393         | 186            | 2                          | 85             | 36                   | 69             |
| nsp2                            | 54            | 48674         | 492            | 2                          | 87             | 127                  | 74             | nsp5                            | 31            | 17136         | 173            | 2                          | 87             | 61                   | 72             |
| ORF7a                           | 48            | 59270         | 599            | 2                          | 89             | 23                   | 76             | nsp16                           | 20            | 20221         | 204            | 2                          | 89             | 59                   | 75             |
| Nsp6                            | 49            | 28783         | 291            | 2                          | 91             | 58                   | 79             | nsp13                           | 25            | 16004         | 162            | 2                          | 91             | 120                  | 81             |
| nsp14                           | 44            | 26059         | 263            | 2                          | 93             | 105                  | 84             | ORF8                            | 32            | 22389         | 226            | 1                          | 92             | 23                   | 83             |
| nsp5                            | 46            | 29139         | 294            | 2                          | 94             | 61                   | 87             | ORF7a                           | 28            | 19612         | 198            | 1                          | 93             | 23                   | 84             |
| E                               | 33            | 21161         | 214            | 1                          | 95             | 13                   | 88             | nsp14                           | 19            | 11135         | 112            | 1                          | 94             | 105                  | 89             |
| nsp1                            | 22            | 20357         | 206            | 1                          | 97             | 36                   | 90             | nsp7                            | 18            | 7480          | 76             | 1                          | 95             | 17                   | 90             |
| nsp8-9-10                       | 37            | 21419         | 216            | 1                          | 98             | 91                   | 95             | nsp8-9-10                       | 18            | 14067         | 142            | 1                          | 97             | 91                   | 95             |
| nsp15                           | 29            | 17154         | 173            | 1                          | 98             | 70                   | 98             | ORF6                            | 24            | 12947         | 131            | 1                          | 98             | 11                   | 95             |
| ORF6                            | 27            | 10632         | 107            | 1                          | 99             | 11                   | 99             | nsp15                           | 14            | 12208         | 123            | 1                          | 99             | 70                   | 99             |
| ORF10                           | 19            | 7551          | 76             | 0                          | 100            | 6                    | 99             | ORF10                           | 20            | 12178         | 123            | 1                          | 99             | 6                    | 99             |
| nsp7                            | 19            | 14248         | 144            | 0                          | 100            | 17                   | 100            | E                               | 20            | 9542          | 96             | 1                          | 100            | 13                   | 100            |

<sup>a</sup>Bold font indicates the top SARS-CoV-2 proteins accounting for a cumulative response >80% for CD4<sup>+</sup> and CD8<sup>+</sup> T cells.

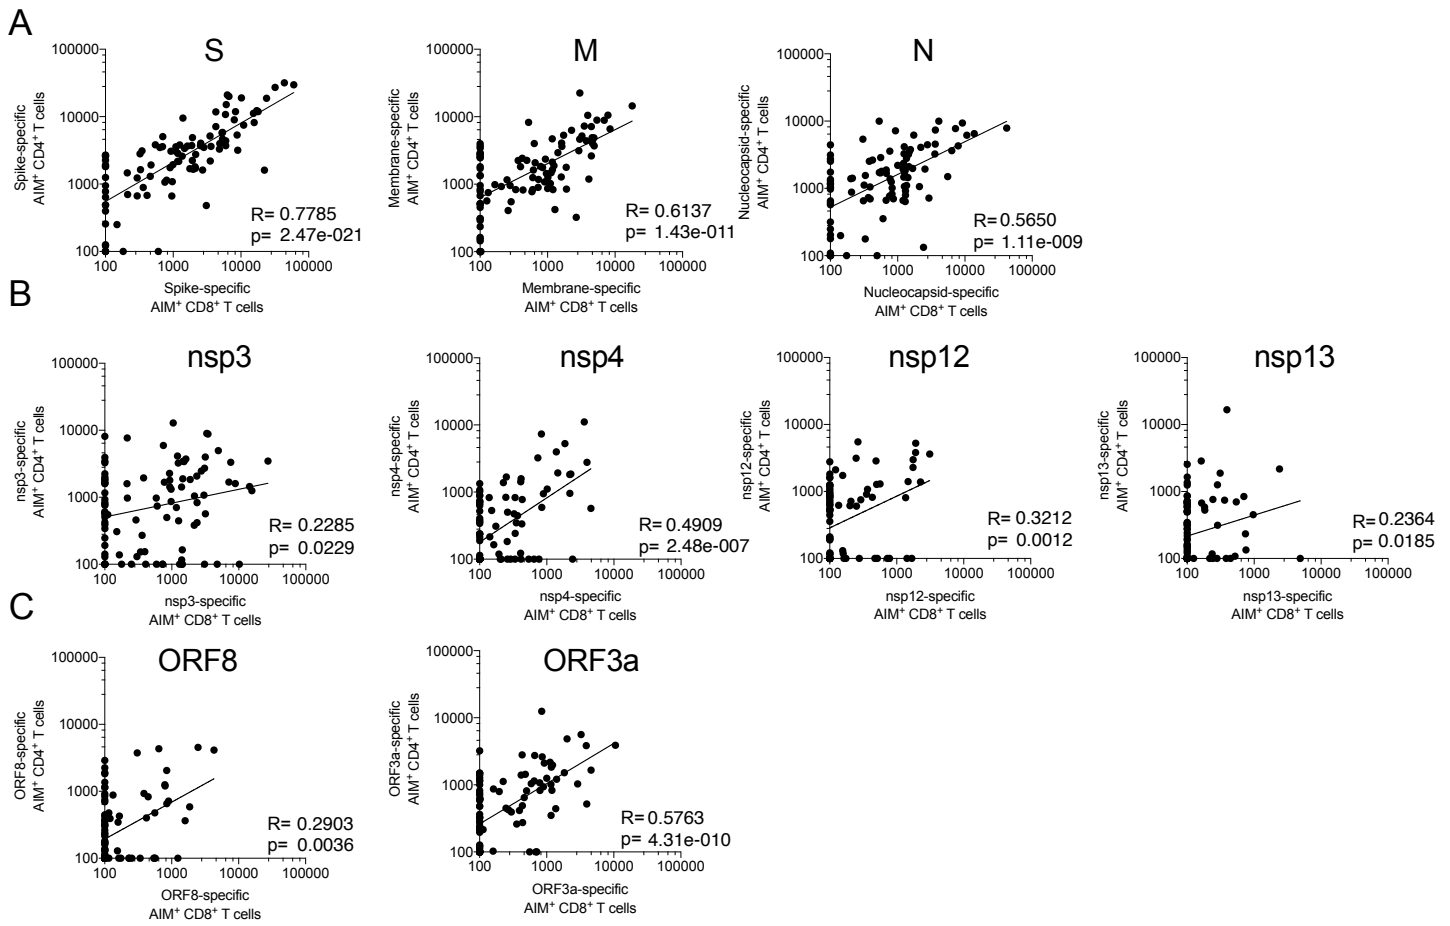

**Fig. S2. Correlations of SARS-CoV-2-specific CD4<sup>+</sup> and CD8<sup>+</sup> T cell reactivities per protein. Related to Fig. 2.**

CD4<sup>+</sup> and CD8<sup>+</sup> T cell reactivities are correlated for each of the 9 SARS-CoV-2 antigens that were immunodominant for CD4<sup>+</sup> T cells: S, M, and N (A); nsp3, nsp4, nsp12, and nsp13 (B); and ORF8 and ORF3a (C). All analyses were performed using Spearman correlation and the p-values shown were not corrected for multiple hypothesis testing.

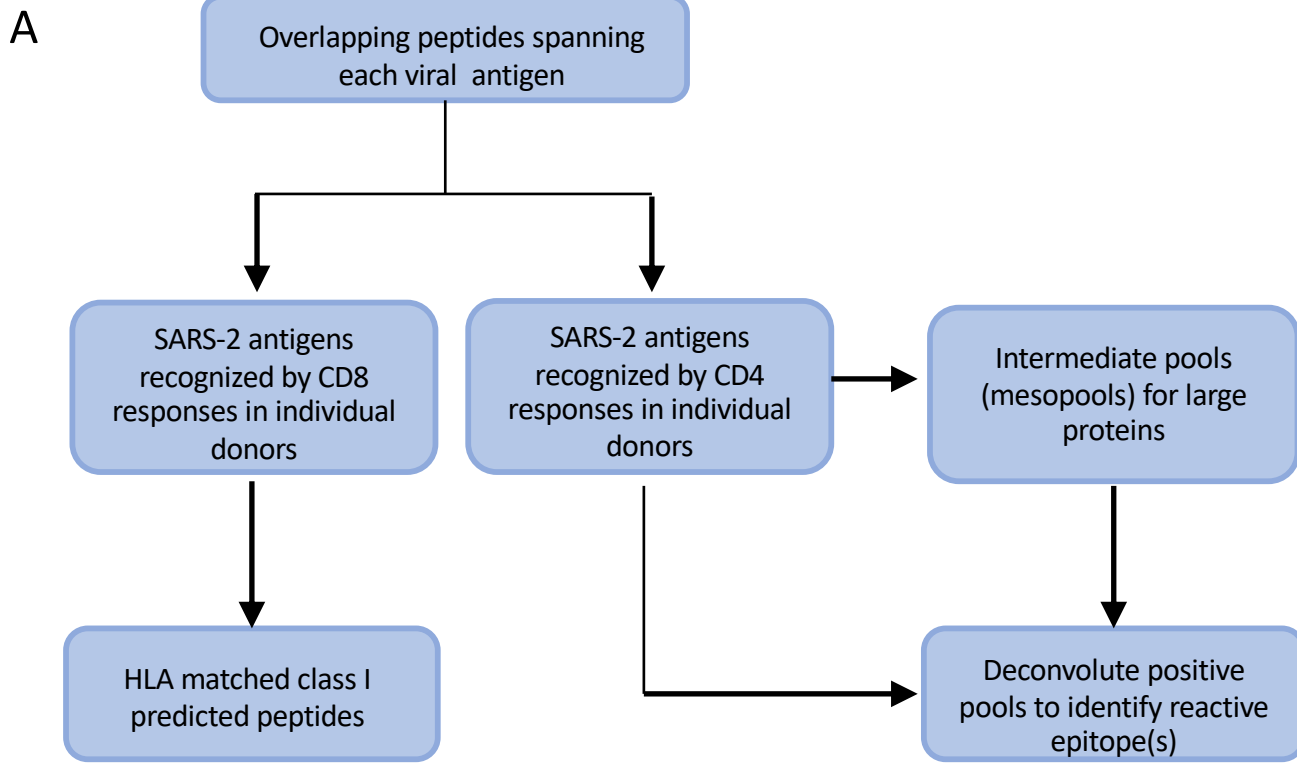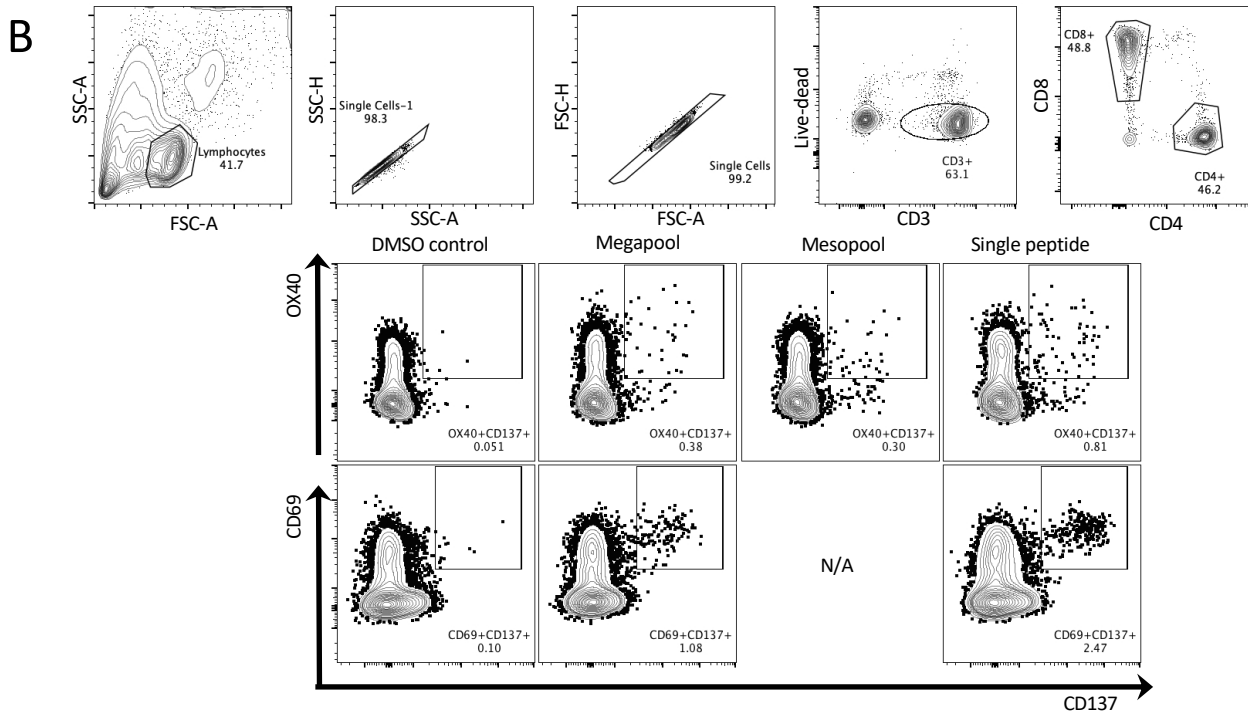

**Fig. S3. Summary of experimental strategy. Related to Fig. 1.**

Scheme of experimental strategy selected for HLA class I and class II epitope identification (A). Representative graphs depicting the flow cytometry gating strategy for defining antigen-specific CD4<sup>+</sup> and CD8<sup>+</sup> T cells by OX40<sup>+</sup>CD137<sup>+</sup> and CD69<sup>+</sup>CD137<sup>+</sup> expression, respectively (B).

**Table S4.** Number of predicted epitopes synthesized based on the most frequent 28 HLA class I alleles. Related to Fig. 4.

| Allele            | nsp1 | nsp2 | nsp3 | nsp4 | nsp5 | nsp6 | nsp7 | nsp8 | nsp9 | nsp10 | nsp12 | nsp13 | nsp14 | nsp15 | nsp16 | S   | ORF3a | E  | M   | ORF6 | ORF7a | ORF8 | N   | ORF10 | Total per allele |
|-------------------|------|------|------|------|------|------|------|------|------|-------|-------|-------|-------|-------|-------|-----|-------|----|-----|------|-------|------|-----|-------|------------------|
| A*01:01           | 3    | 9    | 36   | 7    | 9    | 0    | 0    | 5    | 21   | 1     | 39    | 11    | 4     | 2     | 3     | 26  | 9     | 0  | 7   | 0    | 2     | 2    | 4   | 0     | 200              |
| A*02:01           | 4    | 12   | 35   | 12   | 7    | 16   | 3    | 5    | 2    | 1     | 17    | 11    | 12    | 10    | 6     | 17  | 10    | 2  | 4   | 3    | 5     | 3    | 2   | 1     | 200              |
| A*02:03           | 8    | 18   | 39   | 16   | 6    | 11   | 3    | 5    | 2    | 2     | 13    | 12    | 11    | 4     | 6     | 25  | 6     | 3  | 1   | 1    | 1     | 5    | 2   | 0     | 200              |
| A*02:06           | 3    | 9    | 42   | 18   | 4    | 12   | 3    | 3    | 2    | 1     | 20    | 10    | 12    | 12    | 7     | 18  | 8     | 2  | 2   | 3    | 2     | 3    | 2   | 2     | 200              |
| A*03:01           | 4    | 14   | 51   | 7    | 6    | 0    | 2    | 7    | 1    | 1     | 23    | 18    | 5     | 9     | 6     | 30  | 5     | 0  | 2   | 1    | 0     | 0    | 8   | 0     | 200              |
| A*11:01           | 1    | 17   | 57   | 9    | 3    | 3    | 1    | 7    | 1    | 1     | 21    | 10    | 5     | 9     | 5     | 25  | 8     | 1  | 5   | 0    | 1     | 0    | 10  | 0     | 200              |
| A*23:01           | 2    | 4    | 45   | 16   | 3    | 14   | 0    | 2    | 2    | 0     | 19    | 6     | 15    | 7     | 6     | 34  | 8     | 0  | 4   | 0    | 1     | 3    | 5   | 4     | 200              |
| A*24:02           | 2    | 4    | 48   | 14   | 3    | 16   | 0    | 2    | 3    | 0     | 20    | 6     | 16    | 8     | 5     | 35  | 6     | 0  | 4   | 0    | 1     | 1    | 2   | 4     | 200              |
| A*26:01           | 3    | 8    | 61   | 11   | 4    | 3    | 2    | 2    | 1    | 2     | 30    | 17    | 8     | 5     | 5     | 23  | 6     | 0  | 2   | 0    | 1     | 1    | 4   | 1     | 200              |
| A*29:02           | 1    | 9    | 43   | 17   | 6    | 8    | 0    | 2    | 1    | 1     | 27    | 17    | 11    | 6     | 3     | 23  | 8     | 2  | 6   | 1    | 1     | 3    | 2   | 2     | 200              |
| A*30:01           | 3    | 12   | 43   | 6    | 3    | 3    | 0    | 4    | 1    | 1     | 24    | 18    | 10    | 9     | 6     | 21  | 4     | 3  | 9   | 0    | 3     | 1    | 15  | 1     | 200              |
| A*30:02           | 2    | 4    | 43   | 13   | 4    | 6    | 0    | 5    | 2    | 0     | 29    | 16    | 10    | 6     | 2     | 29  | 5     | 3  | 9   | 1    | 1     | 3    | 6   | 1     | 200              |
| A*31:01           | 6    | 13   | 20   | 11   | 4    | 5    | 0    | 3    | 2    | 0     | 31    | 13    | 9     | 7     | 6     | 33  | 2     | 3  | 15  | 0    | 3     | 2    | 12  | 0     | 200              |
| A*32:01           | 2    | 11   | 42   | 17   | 1    | 11   | 6    | 6    | 0    | 0     | 16    | 13    | 13    | 7     | 9     | 23  | 8     | 2  | 4   | 2    | 1     | 1    | 4   | 1     | 200              |
| A*33:01           | 9    | 10   | 19   | 16   | 7    | 6    | 0    | 4    | 4    | 0     | 25    | 15    | 13    | 8     | 7     | 25  | 5     | 1  | 14  | 0    | 3     | 3    | 5   | 1     | 200              |
| A*68:01           | 5    | 15   | 46   | 10   | 4    | 8    | 0    | 5    | 0    | 2     | 26    | 11    | 4     | 10    | 6     | 25  | 5     | 2  | 8   | 0    | 1     | 0    | 7   | 0     | 200              |
| A*68:02           | 1    | 10   | 48   | 10   | 2    | 8    | 2    | 4    | 0    | 0     | 23    | 17    | 8     | 4     | 4     | 31  | 10    | 4  | 3   | 2    | 2     | 2    | 4   | 1     | 200              |
| B*07:02           | 8    | 9    | 35   | 9    | 9    | 3    | 0    | 7    | 3    | 3     | 17    | 23    | 6     | 11    | 9     | 21  | 4     | 0  | 4   | 0    | 4     | 1    | 12  | 2     | 200              |
| B*08:01           | 3    | 14   | 26   | 13   | 7    | 6    | 3    | 5    | 4    | 1     | 27    | 15    | 12    | 5     | 9     | 26  | 7     | 1  | 6   | 2    | 3     | 0    | 4   | 1     | 200              |
| B*15:01           | 3    | 11   | 46   | 15   | 4    | 5    | 3    | 6    | 0    | 4     | 26    | 13    | 13    | 7     | 2     | 22  | 0     | 2  | 6   | 0    | 2     | 2    | 8   | 0     | 200              |
| B*35:01           | 4    | 4    | 44   | 12   | 2    | 8    | 2    | 4    | 3    | 3     | 26    | 10    | 11    | 9     | 7     | 29  | 4     | 1  | 4   | 0    | 4     | 0    | 8   | 1     | 200              |
| B*40:01           | 5    | 27   | 53   | 13   | 1    | 2    | 2    | 8    | 1    | 3     | 16    | 10    | 5     | 16    | 6     | 19  | 1     | 1  | 3   | 1    | 3     | 3    | 1   | 0     | 200              |
| B*44:02           | 5    | 25   | 53   | 5    | 1    | 1    | 2    | 8    | 1    | 2     | 20    | 12    | 8     | 7     | 8     | 19  | 8     | 0  | 4   | 1    | 1     | 0    | 9   | 0     | 200              |
| B*44:03           | 5    | 24   | 57   | 5    | 1    | 1    | 2    | 8    | 1    | 3     | 19    | 12    | 7     | 8     | 8     | 16  | 8     | 0  | 4   | 1    | 2     | 0    | 8   | 0     | 200              |
| B*51:01           | 5    | 16   | 35   | 12   | 4    | 11   | 1    | 6    | 1    | 1     | 22    | 15    | 6     | 7     | 7     | 28  | 7     | 0  | 2   | 0    | 1     | 2    | 7   | 4     | 200              |
| B*53:01           | 3    | 8    | 37   | 5    | 5    | 10   | 2    | 4    | 2    | 3     | 18    | 9     | 15    | 9     | 4     | 39  | 5     | 0  | 4   | 0    | 5     | 1    | 10  | 2     | 200              |
| B*57:01           | 3    | 8    | 44   | 9    | 8    | 17   | 2    | 7    | 2    | 0     | 14    | 9     | 13    | 8     | 10    | 17  | 10    | 0  | 8   | 1    | 5     | 0    | 5   | 0     | 200              |
| B*58:01           | 3    | 5    | 42   | 8    | 8    | 13   | 1    | 9    | 2    | 0     | 18    | 8     | 15    | 9     | 12    | 19  | 12    | 0  | 7   | 1    | 2     | 0    | 5   | 1     | 200              |
| Total per protein | 106  | 330  | 1190 | 316  | 126  | 207  | 42   | 143  | 65   | 36    | 626   | 357   | 277   | 219   | 174   | 698 | 179   | 33 | 151 | 21   | 61    | 42   | 171 | 30    | 5600             |

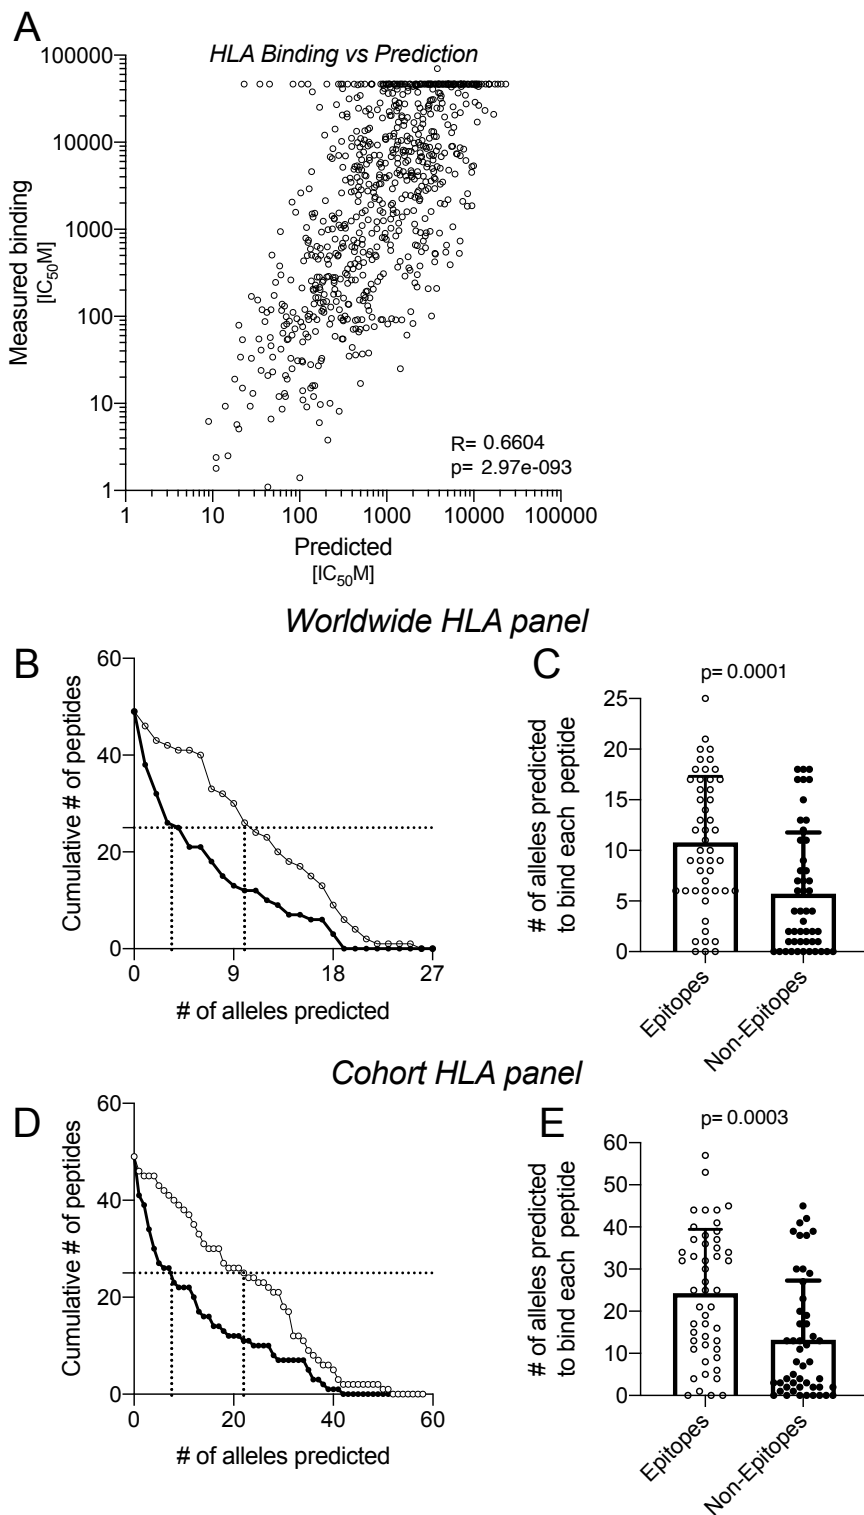

**Fig. S4. SARS-CoV-2 immunodominant epitope HLA class II binding capacity and promiscuity. Related to Fig. 3.**

A comparison of the HLA class II binding capacity of 49 immunodominant epitopes as determined by binding predictions or as measured experimentally (A), suggesting feasibility for using binding predictions to assess HLA-restriction. Predicted HLA class II binding promiscuity is shown for the same 49 epitopes (white circles), and also 49 non-epitopes (black circles), considering the 27 HLA class II alleles most frequent worldwide (B-C), or the 58 HLA class II alleles specific to the study cohort (D-E). The number of HLA class II alleles predicted to bind epitopes (white circles) and non-epitopes (black circles) are based on a prediction cutoff value of  $IC_{50} \leq 1000nM$ . Statistical comparisons were performed using Mann-Whitney.



Table S7. HLA binding analysis of the 49 class II epitopes identified in 3 or more donors. Related to Fig. 3.

| Pepptide         | DRB1* 01:01 | DRB1* 03:01 | DRB1* 04:01 | DRB1* 04:05 | DRB1* 07:01 | DRB1* 08:02 | DRB1* 09:01 | DRB1* 11:01 | DRB1* 12:01 | DRB1* 13:02 | DRB1* 15:01 | DRB3* 01:01 | DRB3* 02:02 | DRB4* 01:01 | DRB5* 01:01 |
|------------------|-------------|-------------|-------------|-------------|-------------|-------------|-------------|-------------|-------------|-------------|-------------|-------------|-------------|-------------|-------------|
| CEFFQFCNDPFLGVVY | 6946        | 26787       | 24553       | 8931        | 23604       | >40k        | 5606        | >40k        | >40k        | >40k        | 7576        | 283         | >40k        | >40k        | 7841        |
| SSANNCTFEYVSQPF  | 3782        | 26450       | 8974        | 3483        | 519         | 5263        | 208         | >40k        | 6177        | >40k        | 663         | 1070        | >40k        | >40k        | 4524        |
| CTFEYVSQPFMLDLE  | 31          | 5245        | 11014       | 115         | 15          | 1645        | 12          | 30036       | 2487        | >40k        | 163         | 92          | >40k        | >40k        | 285         |
| LMDELGKQGNFKNLR  | 650         | >40k        | >40k        | 1870        | 2099        | 12870       | 7339        | 30972       | >40k        | >40k        | 5036        | 23143       | >40k        | >40k        | 195         |
| NIDGYFKYSKHTPI   | 169         | >40k        | 7198        | 1101        | 9.7         | 17          | 95          | 28          | 4077        | 558         | 10          | 547         | 4459        | 10230       | 86          |
| NLVRDLPGQFSALEP  | 1554        | 942         | 28349       | 19268       | 1590        | 7264        | 7967        | 1600        | 1178        | 247         | 2438        | 6.6         | 9938        | 6202        | 6125        |
| RFASVYAWNKRKRSN  | 505         | 19059       | 2682        | 3859        | 205         | 59          | 637         | 21          | 11511       | 6785        | 92          | 218         | 3070        | 11097       | 0.86        |
| NLLLYQSGSFCQLNR  | 705         | >40k        | 3674        | 99          | 4816        | 10477       | 313         | 28362       | 5681        | >40k        | 1.1         | 7523        | >40k        | 840         | 3316        |
| NFSQILPDPSPKSPKR | 1237        | 1501        | 256         | 3016        | >40k        | 14753       | 24931       | 1390        | >40k        | 13341       | 61          | 204         | 769         | 162         | 2365        |
| AGFIKQYGDCLGDI   | 300         | >40k        | 20591       | 5607        | 15605       | 8979        | >40k        | 839         | >40k        | >40k        | 6           | 4203        | 9508        | 117         | 94          |
| SWFTALTQHGKEDLK  | 72          | >40k        | 398         | 1643        | 17069       | 2261        | 2078        | 1117        | >40k        | >40k        | 12275       | 7011        | 24709       | 8103        | 34          |
| DDQIGYYRRATRRIR  | 111         | >40k        | 10005       | 5753        | 215         | 27          | 182         | 15          | >40k        | >40k        | 145         | 553         | 11802       | 10210       | 34          |
| YYRRATRIRGGDGK   | 299         | >40k        | 16817       | 26007       | 429         | 36          | 1314        | 119         | >40k        | 38689       | 1688        | 8659        | >40k        | 9047        | 57          |
| NKDGIIWVATEGALN  | 174         | 24475       | 792         | 2140        | 106         | 14186       | 94          | >40k        | 28295       | 5166        | 452         | 9774        | 22404       | 812         | 7085        |
| AGNGGDAALLALLLD  | 280         | >40k        | 13223       | 1150        | 1508        | >40k        | 897         | >40k        | 732         | >40k        | 101         | 912         | >40k        | 190         | 4787        |
| DAALALLLDRLNQL   | 203         | 1382        | 13990       | 262         | 4770        | 809         | 4173        | 486         | 137         | 593         | 71          | 61          | >40k        | 19          | 6832        |
| LLLLDRLNQLESKMS  | 505         | 1572        | 9927        | 2469        | 11692       | 661         | 20232       | 164         | 453         | 1048        | 176         | 212         | 3416        | 143         | 1562        |
| AAEASKPRQKRTAT   | >40k        | >40k        | >40k        | >40k        | >40k        | 34741       | >40k        | 8920        | >40k        | 17038       | >40k        | >40k        | >40k        | 14790       | 2655        |
| KKPRQKRTATKAYNV  | 10628       | >40k        | >40k        | >40k        | 96          | 1902        | 4167        | 10895       | >40k        | >40k        | 9299        | >40k        | >40k        | >40k        | 6646        |
| KRTATKAYNVQAFG   | 2852        | >40k        | 22865       | 11070       | 132         | 12626       | 447         | 20127       | >40k        | 7725        | 1638        | 11661       | 447         | 3986        | 1558        |
| WPQIQAFAPSASAFF  | 23          | >40k        | 258         | 492         | 9.3         | 395         | >40k        | 2916        | >40k        | >40k        | 9.1         | 66          | >40k        | >40k        | 374         |
| PSGTWLYTGAIKLD   | 41          | 6252        | 7087        | 6304        | 6.2         | 3952        | >40k        | 5860        | 1015        | >40k        | 100         | 113         | >40k        | >40k        | 30          |
| FKDQWILLNKHIDAY  | 99          | 4799        | 13537       | 695         | 414         | 148         | >40k        | 433         | 148         | >40k        | 81          | 2248        | >40k        | 37936       | 2754        |
| ILLNKHIDAYKTFPP  | 627         | >40k        | >40k        | 8357        | 3212        | 1254        | >40k        | 1974        | >40k        | >40k        | 14          | 6769        | >40k        | >40k        | 1094        |
| TQHQPVVDDPCPIH   | 22686       | 21176       | >40k        | >40k        | 17613       | >40k        | 35313       | >40k        | >40k        | 32533       | 8335        | 79          | >40k        | 19493       | 30768       |
| YVVDDPCPIHFSYK   | >40k        | 803         | 9265        | >40k        | >40k        | 27613       | 2768        | 20527       | >40k        | 25989       | 656         | 58          | 27684       | 906         | >40k        |
| PCPIHFSYKQVIRV   | 6513        | 21090       | 4597        | 900         | 239         | 1220        | 753         | 31597       | >40k        | 24315       | 21          | 22344       | >40k        | 630         | 1315        |
| FYSKYRIRVGRKSA   | 1.8         | 38596       | 498         | 179         | 8.6         | 25          | 55          | 54          | 5727        | >40k        | 164         | 422         | 5253        | 2613        | 0.77        |
| IGNYTVSCLPFTNC   | 92          | >40k        | 3302        | 4098        | 44          | 3771        | 101         | 2333        | 4720        | 20150       | 1994        | 612         | 11780       | >40k        | 360         |
| FTINCQEPKLGSLVV  | 506         | >40k        | >40k        | >40k        | 3294        | 3898        | 5936        | 920         | 529         | 16253       | 4990        | 5352        | 1705        | 98          | 4087        |
| GSLVVRCSFYEDFLE  | 8214        | 4608        | 1331        | 309         | 964         | 10509       | 290         | >40k        | 19312       | >40k        | 206         | 83          | >40k        | >40k        | 8478        |
| RCSFYEDFLEHYDVR  | 484         | 9278        | 36490       | 5172        | 1988        | 735         | 3586        | 4322        | 25468       | >40k        | 3142        | 1042        | 36663       | 6053        | 210         |
| QFAYANRNFYIHK    | 11          | 1138        | 3944        | 769         | 120         | 93          | 244         | 117         | 72          | 154         | 33          | 193         | 199         | 19536       | 54          |
| VLAAYRINWITGGI   | 121         | 36604       | 351         | 252         | 74          | 151         | 38          | 92          | 10356       | 455         | 91          | 13953       | 78          | 487         | 92          |
| YRINWITGGIAMA    | 9.3         | >40k        | 7073        | 4895        | 12          | 351         | 111         | 1393        | 3543        | 2624        | 13          | 4116        | 631         | 633         | 1543        |
| CLVGLMWLSYFIASF  | 505         | >40k        | 31869       | 3646        | 5859        | >40k        | 339         | 30074       | 4438        | >40k        | 90          | 27076       | >40k        | >40k        | 11097       |
| MWLSYFIASFRLFAR  | 380         | 10769       | 5192        | 771         | 262         | 119         | 111         | 33          | 27091       | >40k        | 87          | 20263       | >40k        | 990         | 131         |
| TNLLNVPLHGTLT    | 55          | 4228        | 694         | 909         | 1031        | 528         | 404         | 1010        | 553         | 33          | 128         | 946         | 119         | 997         | 3466        |
| SELVIGAVILRGHLR  | 46          | 34557       | 20482       | 8846        | 611         | 12106       | 1430        | 25154       | 790         | 1249        | 604         | 8759        | 6162        | 2551        | 138         |
| RGHLRIAGRHHLGRCD | 64          | 18371       | 571         | 7860        | 235         | 55          | 92          | 82          | >40k        | 3954        | 35          | 1843        | 2799        | 55          | 67          |
| IAGRHHLGRCDIKDLP | 2134        | >40k        | >40k        | 8926        | >40k        | >40k        | >40k        | 37099       | 2575        | 21846       | 2187        | >40k        | >40k        | >40k        | 15863       |
| LRGCRDIKDPKETT   | >40k        | >40k        | >40k        | >40k        | >40k        | 3514        | >40k        | 3900        | 7059        | 7949        | 28038       | 2237        | >40k        | 27485       | 13289       |
| IKDLPKETTATSRT   | 2644        | >40k        | 7673        | 7553        | 5189        | 4601        | 380         | 6836        | >40k        | 33962       | 6817        | >40k        | >40k        | 1030        | 2392        |
| KEITVATSRILSYK   | 2.4         | 208         | 929         | 8454        | 19          | 283         | 24          | 229         | 2924        | 246         | 5.1         | 2761        | 14511       | 504         | 42          |
| LSYYKLGASQRYAGD  | 0.85        | 14589       | 88          | 178         | 13          | 279         | 5.7         | 747         | >40k        | 4589        | 283         | 82          | 51          | 9484        | 2.5         |
| SGFAAYSRYIGNYK   | 138         | >40k        | 7026        | 4143        | 620         | 37          | 71          | 259         | >40k        | >40k        | 63          | 529         | 7025        | 36269       | 31          |
| LYLYALVYFLQSNF   | 154         | >40k        | 2945        | 368         | 91          | 24356       | 91          | >40k        | 25          | >40k        | 76          | 1957        | 28791       | 242         | 2947        |
| QSNFVRIMRLWLC    | 139         | 9575        | 3335        | 512         | 268         | 546         | 2170        | 497         | 89          | >40k        | 16          | >40k        | 24678       | 164         | 31          |
| LMIERFVSLAIDAYP  | 12          | 6590        | 288         | 76          | 8.1         | 670         | 3.8         | 1916        | 16          | 5367        | 0.084       | 262         | 961         | 1.4         | 298         |

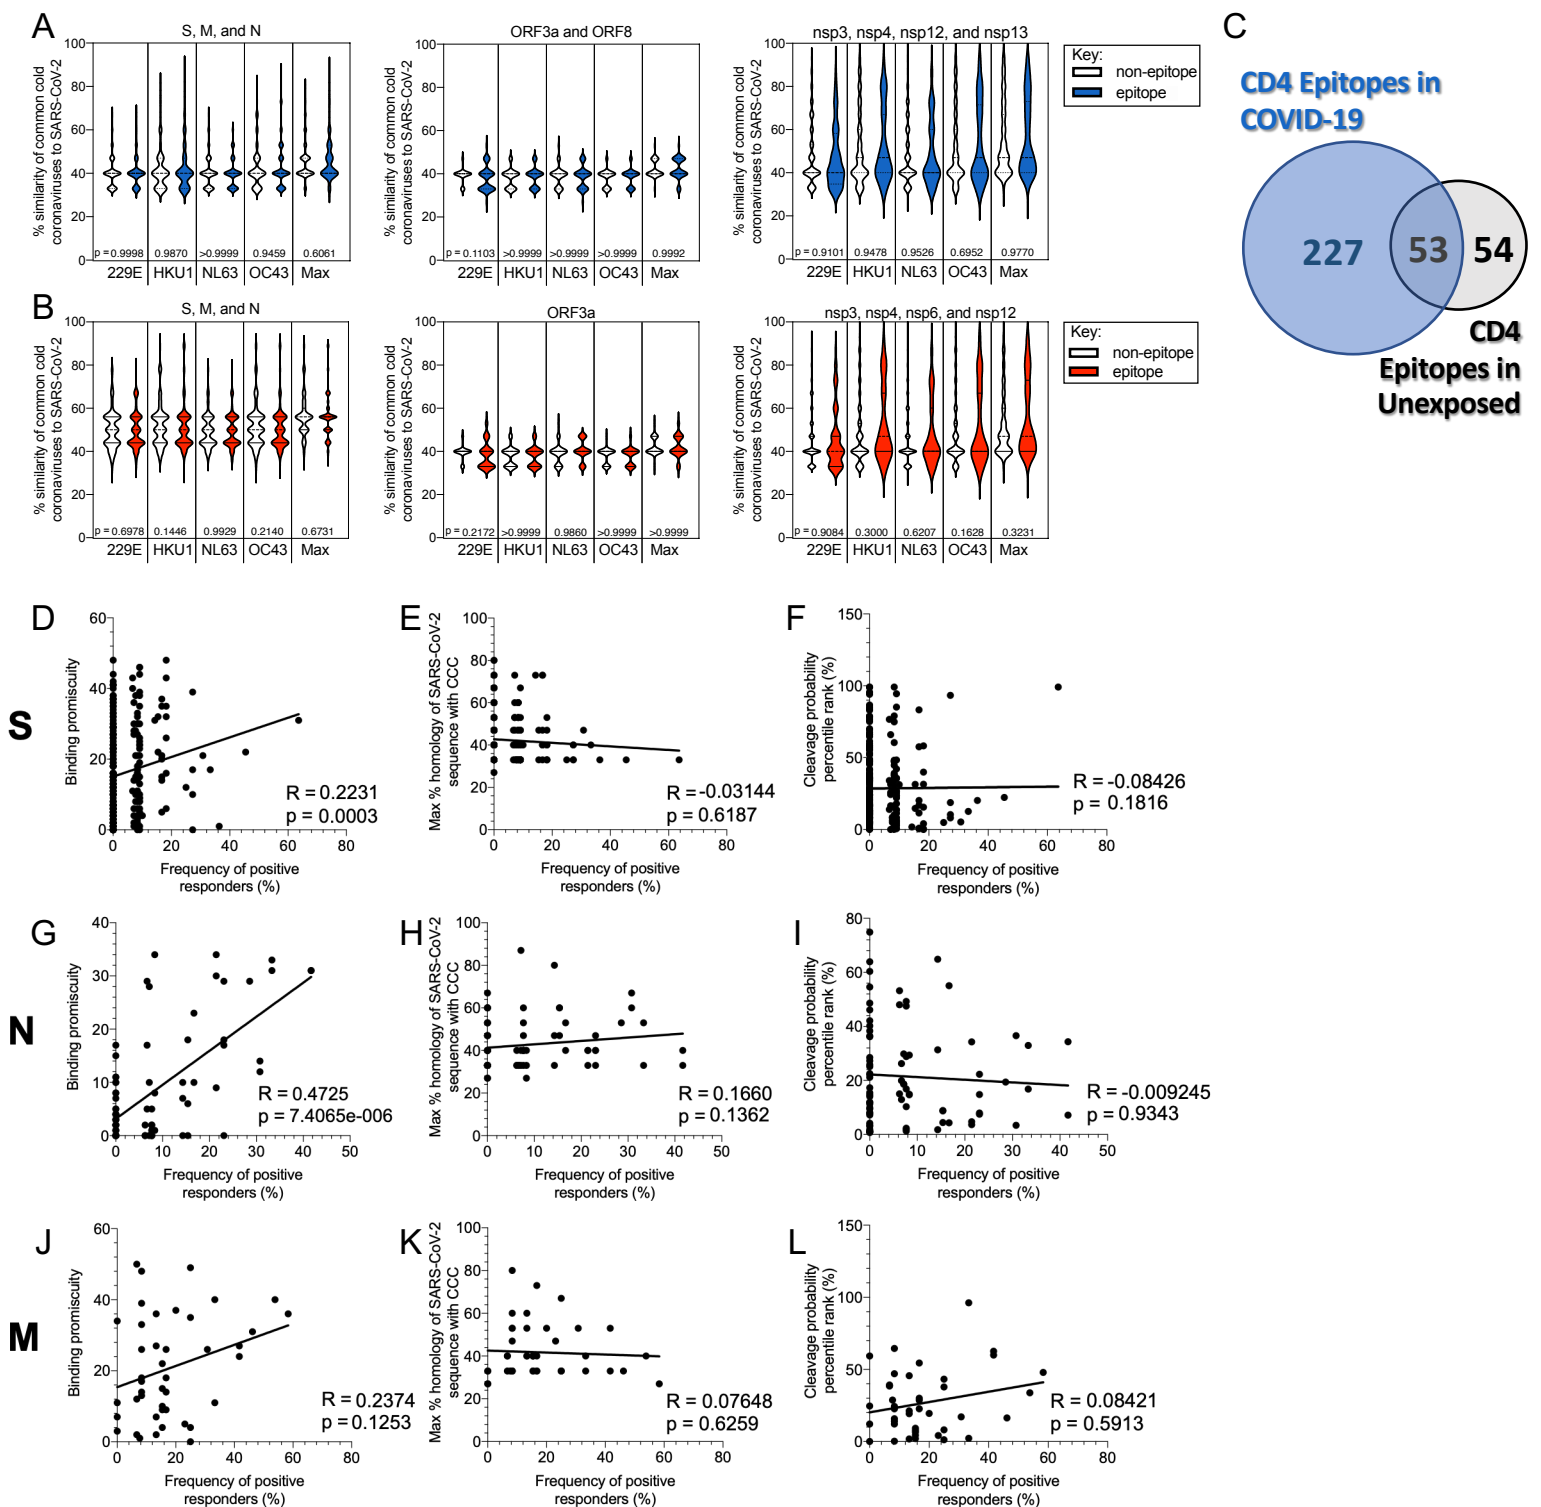

**Fig. S5. Analyses of CD4<sup>+</sup> and CD8<sup>+</sup> T cell epitopes identified compared to non-epitopes and correlations of binding promiscuity, homology to CCC, and frequency of positive response. Related to Fig. 4-5.**

Comparison of sequenced identity between CD4<sup>+</sup> T cell epitopes and non-epitopes as a function of sequence identity with the CCC in S, M, and N combined, ORF8 and ORF3a, and non-structural proteins (A). For CD8<sup>+</sup> epitopes and non-epitopes, the sequence identities with CCC are shown for S, M, and N, ORF3a, and non-structural proteins (B). Statistical analyses were performed using the Kolmogorov-Smirnov test, and data are shown as violin plots. (C) Overlap of previously identified epitopes in unexposed (Mateus et al., 2020 Science) with the proteins analyzed in this study and the current epitopes identified in COVID-19 donors. The Venn diagram was calculated with the Venn Diagram Plotter (PNNL, OMICS.PNL.gov). Correlations of predicted binding promiscuity to the alleles present in the donor cohort tested with the frequency of positive response for S (D), N (G), and M (J) epitopes. Frequency of positive response is also correlated with the maximum % homology of the SARS-CoV-2 sequence to CCC and plotted for S (E), N (H), and M (K). In the final column of panels, the correlation of frequency of positivity and the cleavage probability percentile rank (calculated using the IEDB MHCII-NP tool) are shown for S (F), N (I), and M (L). Statistics were performed using the Spearman correlation and the line on each graph is a simple linear regression.

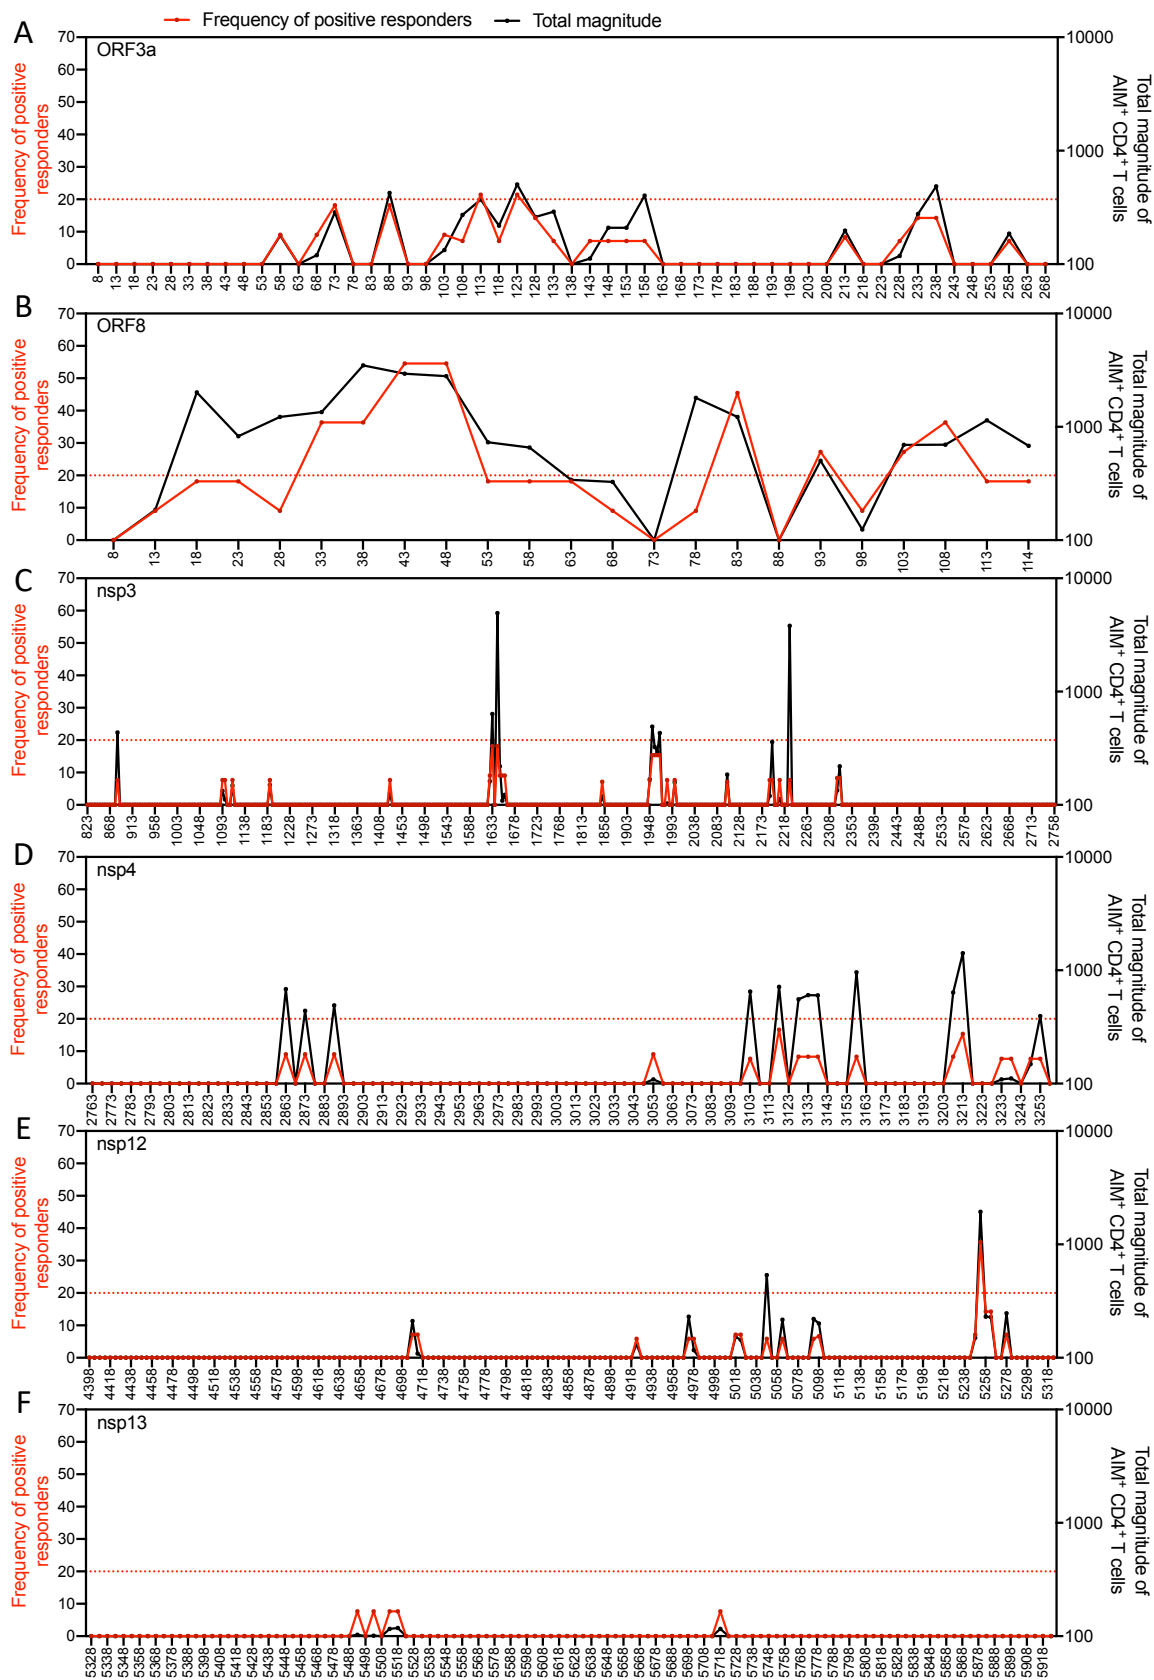

**Fig. S6. Immunodominant regions for the other major antigens for CD4<sup>+</sup> T cells. Related to Fig. 5.**

Immunodominant regions for the other major antigens for CD4<sup>+</sup> T cells: ORF3a (A), ORF8 (B), nsp3 (C), nsp4 (D), nsp12 (E), and nsp13 (F). The frequency of positive responders is shown in red and the total magnitude of response (sum of AIM<sup>+</sup> T cells for each peptide) is shown in black. The x-axis is labeled with the middle, or 8<sup>th</sup>, position of each 15-mer peptide. The dotted red line at 20% frequency of positive responders indicates a cutoff for immunodominant epitopes.
